# Supplementary material for: Copy number-dependent DNA methylation of the Pyricularia oryzae MAGGY retrotransposon is triggered by DNA damage
Source: PubMed Central journal article supplement (PMC7979813; doi:10.1038/s42003-021-01836-5), 2021-03-19
Supplement: 42003_2021_1836_MOESM2_ESM.pdf [file 42003_2021_1836_MOESM2_ESM.pdf]

**Supplementary Table 1. Primer pairs used in qMSRE assay of MAGGY**

| Positions | Sequences                                                     |
|-----------|---------------------------------------------------------------|
| 212S      | 5'-AACAACCACCTGCTACCCTGTA-3', 5'-CTCGGTCGAATCGGTTAAGAT-3'     |
| 817H      | 5'- CTTTCTGAACTTCCAGACC-3', 5'- CGGTCTTTGTTTGAGGGTCATCT-3'    |
| 1109H     | 5'- GAACGTAGATTTTCGCCGAGTAT-3', 5'- GTCCTGGAGCTCTTCCGATATT-3' |
| 1684H     | 5'- AGCAGCCGAAGTTCGAAAAAC-3', 5'- CGGATCGTTGGTTATATTCCTC-3'   |
| 2152H     | 5'- TACGTTTGACAGCGACTATTGC-3', 5'- GGTCGGTCAGCCTGGTACT-3'     |
| 3023H     | 5'-AGAACATTTGAAACTCGTACTGGA-3', 5'-TGGTTTCCGTCACGAAGAAT-3'    |
| 3697H     | 5'- ACCTGGAATATTTACGACGAC-3', 5'- CATATCCTCTGACCTCCTGGTT-3'   |
| 4148H     | 5'- GACCTGCTGTCCCGAGAATA-3', 5'-CATGAGCGTTCAGGAGTGG-3'        |
| 4750H     | 5'- GTTTTACGCGACTTACGGATTC-3', 5'- GCTTGTCCAGAATGGCTTC-3'     |
| 5113H     | 5'- TGCCGTCGTCTATGAGAGTACA-3', 5'- TTCTCTCTCACCTTCCACTTCC-3'  |
| 5598S     | 5'-CTACGTCTTCGTCAACAACCAC-3', 5'-AACCCGGGCATATTTTTATTTT-3'    |

Supplementary Table 2 Mapping of MeDIP reads to different fractions of the *Pyricularia oryzae* genome

|                            | total reads | CDS        | Intron    | Intergenic | undetermined | RNA genes |          |           |         |        |                  | Repeats <sup>4</sup> |           |        |                         |  |
|----------------------------|-------------|------------|-----------|------------|--------------|-----------|----------|-----------|---------|--------|------------------|----------------------|-----------|--------|-------------------------|--|
|                            |             |            |           |            |              | 26S rRNA  | 18S rRNA | 5.8s rRNA | 5s rRNA | tRNA   | snoRNA/<br>shRNA | non-LTR              | LTR       | DNA    | unclassified<br>repeats |  |
| <b>WT-cont<sup>1</sup></b> |             |            |           |            |              |           |          |           |         |        |                  |                      |           |        |                         |  |
| No of reads                | 40,608,444  | 18,141,382 | 4,547,429 | 15,150,190 | 770,955      | 432,666   | 239,425  | 9,396     | 6,255   | 18,400 | 996              | 195,808              | 509,578   | 60,773 | 525191                  |  |
| percentage                 |             | 44.67%     | 11.20%    | 37.31%     | 1.90%        | 1.07%     | 0.59%    | 0.02%     | 0.02%   | 0.05%  | 0.00%            | 0.48%                | 1.25%     | 0.15%  | 1.29%                   |  |
| <b>WT-5mC<sup>2</sup></b>  |             |            |           |            |              |           |          |           |         |        |                  |                      |           |        |                         |  |
| No of reads                | 7,843,032   | 2,276,984  | 622,908   | 3,028,452  | 620,006      | 229,787   | 114,758  | 6,400     | 1,254   | 2,140  | 81               | 194,493              | 544,482   | 40,667 | 160620                  |  |
| percentage                 |             | 29.03%     | 7.94%     | 38.61%     | 7.91%        | 2.93%     | 1.46%    | 0.08%     | 0.02%   | 0.03%  | 0.00%            | 2.48%                | 6.94%     | 0.52%  | 2.05%                   |  |
| fold enrichment            |             | 0.65       | 0.71      | 1.03       | 4.16         | 2.75      | 2.48     | 3.53      | 1.04    | 0.60   | 0.42             | 5.14                 | 5.53      | 3.46   | 1.58                    |  |
| <b>DKO-5mC<sup>3</sup></b> |             |            |           |            |              |           |          |           |         |        |                  |                      |           |        |                         |  |
| No of reads                | 13,293,983  | 3,358,556  | 944,114   | 5,415,403  | 1,238,545    | 293,672   | 131,917  | 7,171     | 2,361   | 3,567  | 114              | 313,314              | 1,201,419 | 92,275 | 291555                  |  |
| percentage                 |             | 25.26%     | 7.10%     | 40.74%     | 9.32%        | 2.21%     | 0.99%    | 0.05%     | 0.02%   | 0.03%  | 0.00%            | 2.36%                | 9.04%     | 0.69%  | 2.19%                   |  |
| fold enrichment            |             | 0.57       | 0.63      | 1.09       | 4.91         | 2.07      | 1.68     | 2.33      | 1.15    | 0.59   | 0.35             | 4.89                 | 7.20      | 4.64   | 1.70                    |  |

<sup>1</sup>WT-cont, genomic DNA reads of the wild-type strain without MeDIP<sup>2</sup>WT-5mC, MeDIP reads of the wild-type strain<sup>3</sup>DKO-5mC, MeDIP reads of the  $\Delta$  ddnm1/ $\Delta$  rhm51 strain<sup>4</sup>non-LTR, non-LTR retrotransposons; LTR, LTR-retrotransposons; DNA, DNA transposons

Supplementary Table 3 Genomic locations showing different levels of MeDIP read coverage between the wild-type and  $\Delta$ ddm1/ $\Delta$ rhm51 strains

| Chromosome      | Start position | End position | Sequence   | Fold Change | P-value <sup>1</sup> | WT - RPKM | $\Delta$ ddm1/ $\Delta$ rhm51 - RPKM |
|-----------------|----------------|--------------|------------|-------------|----------------------|-----------|--------------------------------------|
| Supercontig_8.1 | 1196000        | 1197000      | Vector     | $\infty$    | 6.24E-03             | 0.00      | 14.24                                |
| Supercontig_8.1 | 6672000        | 6673000      | MAGGY      | -28.2       | 7.21E-04             | 54.75     | 1.94                                 |
| Supercontig_8.2 | 2439000        | 2440000      | Intergenic | 835.1       | 2.65E-05             | 0.05      | 41.80                                |
| Supercontig_8.2 | 3751000        | 3752000      | MGG_01486  | -90.3       | 1.76E-03             | 668.80    | 7.41                                 |
| Supercontig_8.2 | 3752000        | 3753000      | MGG_01486  | -65.0       | 2.36E-03             | 702.55    | 10.80                                |
| Supercontig_8.4 | 1168000        | 1169000      | Vector     | -115.4      | 9.69E-08             | 2197.75   | 19.04                                |
| Supercontig_8.4 | 1169000        | 1170000      | Vector     | -174.4      | 3.38E-08             | 3352.08   | 19.22                                |
| Supercontig_8.4 | 1170000        | 1171000      | Vector     | -55.3       | 8.10E-07             | 2524.53   | 45.61                                |
| Supercontig_8.4 | 1171000        | 1172000      | Vector     | -399.7      | 9.60E-07             | 3703.83   | 9.27                                 |
| Supercontig_8.4 | 1172000        | 1173000      | Vector     | -542.8      | 1.58E-07             | 1137.18   | 2.10                                 |
| Supercontig_8.4 | 1974000        | 1975000      | MAGGY      | -19.9       | 9.68E-03             | 17.50     | 0.88                                 |
| Supercontig_8.5 | 3686000        | 3687000      | MGG_00208  | -17.3       | 3.73E-03             | 71.59     | 4.13                                 |
| Supercontig_8.6 | 3250000        | 3251000      | MAGGY      | -16.0       | 4.97E-03             | 23.58     | 1.47                                 |
| Supercontig_8.8 | 467000         | 468000       | MAGGY      | -41.3       | 2.86E-04             | 321.78    | 7.80                                 |
| Supercontig_8.8 | 512000         | 513000       | Vector     | -86.6       | 5.41E-05             | 269.69    | 3.12                                 |

<sup>1</sup>Significant difference (p<0.01, empirical analysis of DGE (the CLC Genomics Workbench software))

Supplementary Table 4 Fungal strains used in this study

| Strain                                          | Genotype                   | reference                          |
|-------------------------------------------------|----------------------------|------------------------------------|
| <i>P. oryzae</i> Br48                           | wild type                  | Urashima et al. 1998 <sup>37</sup> |
| $\Delta$ ddnm1                                  | ddnm1::hygR                | This study                         |
| $\Delta$ rhm51                                  | rhm51::hygR                | This study                         |
| $\Delta$ ddnm1/ $\Delta$ rhm51( $\Delta$ 11350) | ddnm1/rhm51::hygR          | This study                         |
| $\Delta$ morad55                                | morad55::genR              | This study                         |
| $\Delta$ morad57                                | morad57::genR              | This study                         |
| $\Delta$ ddnm1/ $\Delta$ morad55                | ddnm1::hygR, morad55::genR | This study                         |
| $\Delta$ ddnm1/ $\Delta$ morad57                | ddnm1::hygR, morad57::genR | This study                         |
| $\Delta$ rhm51/ $\Delta$ morad55                | rhm51::hygR, morad55::genR | This study                         |
| $\Delta$ modcl1                                 | modcl1::hygR               | Kadotani et al. 2004 <sup>20</sup> |
| $\Delta$ modcl2                                 | modcl2::hygR               | Kadotani et al. 2004 <sup>20</sup> |
| $\Delta$ moago1                                 | moago1::hygR               | Nguyen et al. 2018 <sup>21</sup>   |
| $\Delta$ moago2                                 | moago2::hygR               | Nguyen et al. 2018 <sup>21</sup>   |
| $\Delta$ moago3                                 | moago3::hygR               | Nguyen et al. 2018 <sup>21</sup>   |

## Supplementary Figure 1. DNA methylation assays of MAGGY

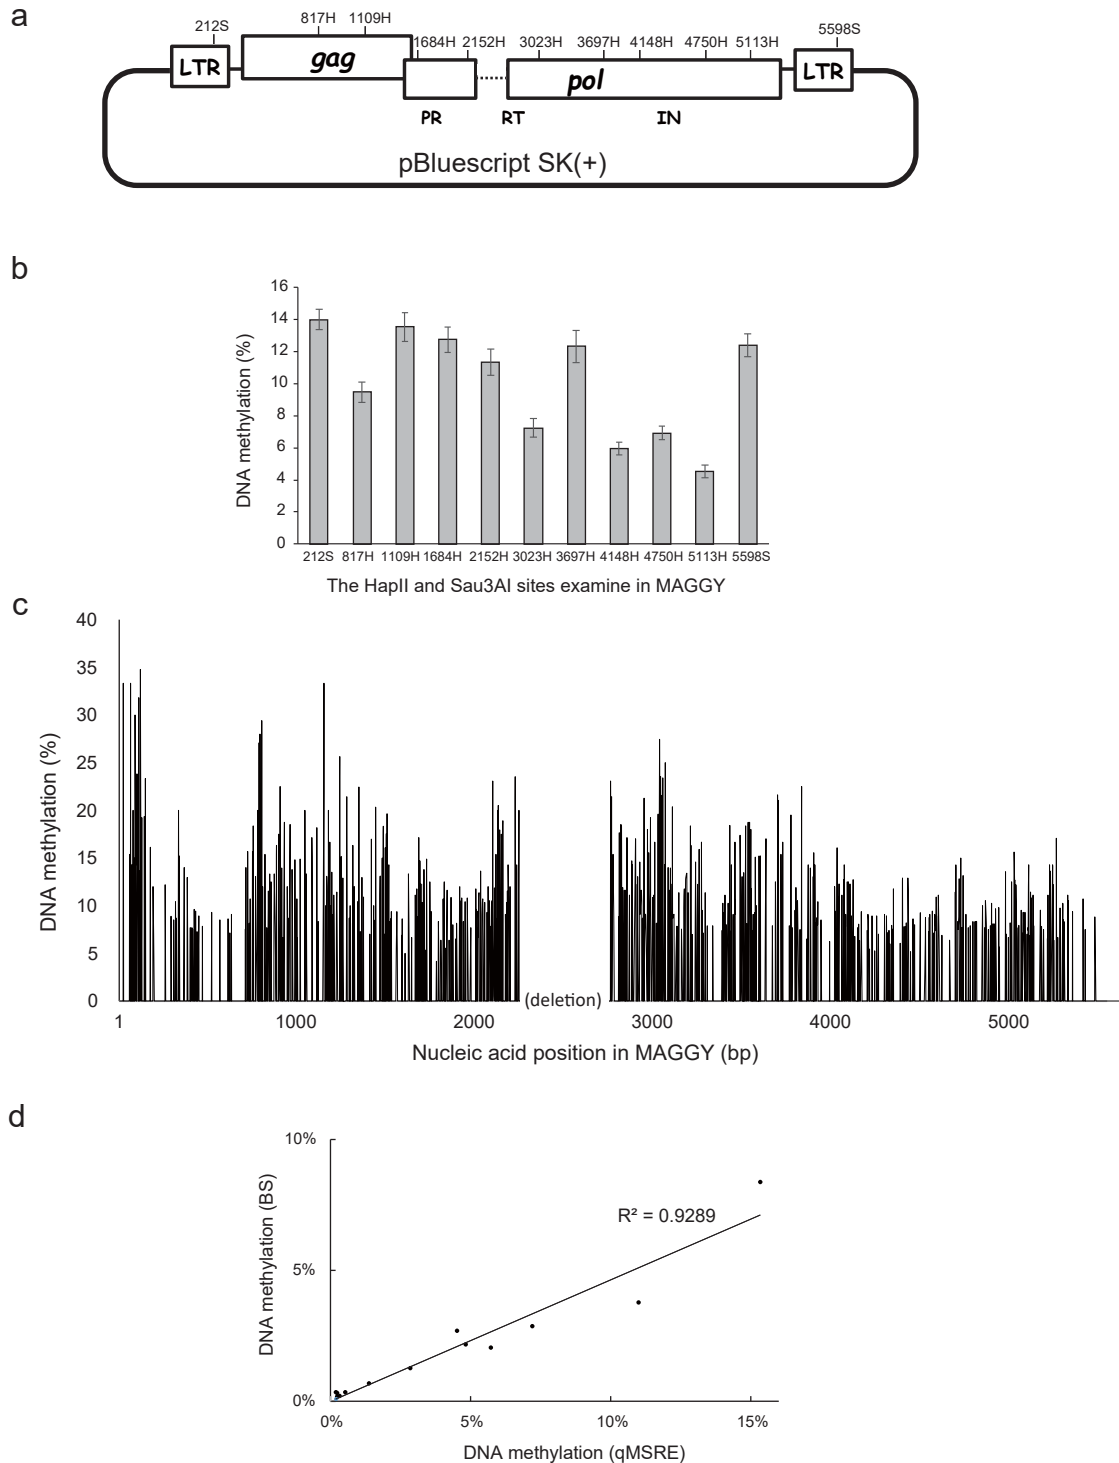

(a) A schematic representation of pMGY- $\Delta$ RT having a 513 bp deletion (shown as a stippled line) in the reverse transcriptase domain of the LTR retrotransposon MAGGY. The positions of *HapII* (H) and *Sau3AI* (S) sites examined for DNA methylation are indicated. LTR, long terminal repeats; gag, group-specific antigen; pol, polyprotein; PR, protease; RT reverse transcriptase; IN, integrase. (b) The rates of DNA methylation at different sites in MAGGY were assessed by the methylation sensitive restriction enzyme-quantitative PCR (qMSRE) method. Eleven pairs of primers listed in Table S1 were used in the analysis. Each bar represents the average of three technical replicates ( $\pm$ SE). (c) The rates of DNA methylation at a total of 595 different positions in MAGGY assessed by whole genome bisulfate sequencing (Bis-seq). A *Pyricularia oryzae* transformant with approximately ten copies of pMGY- $\Delta$ RT was used in this assay. (d) Relationship between rates of DNA methylation assessed by conventional bisulfate sequencing (BS) and qMSRE methods in thirteen *P. oryzae* transformants having different copies of pMGY- $\Delta$ RT. In the BS analysis, an approximately 600bp fragment in the reverse transcriptase domain of MAGGY was amplified and cloned into pBluescript SK(+). Ten to fifteen clones were sequenced for each transformant.

**Supplementary Figure 2. Construction of double deletion mutants of *Rhm51* and *MGG\_15577***

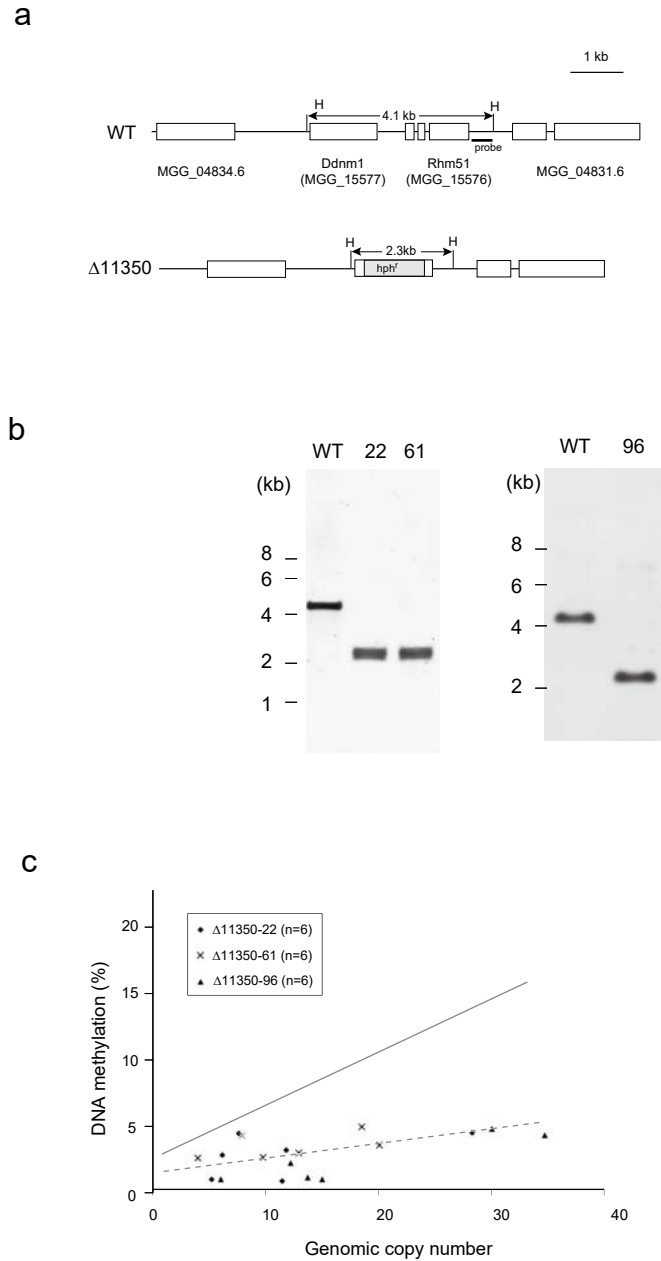

(A) Schematic representation of the *Rhm51* and *MGG\_15577* loci. The open boxes indicate exons and predicted genes. The bold line shows the position of the probe used in the Southern blot analysis. The sizes of the *Hind*III fragments are given with arrowed lines. H, *Hind* III. (b) Genomic Southern analysis of the double deletion mutants (22,  $\Delta$ 11350-22; 61,  $\Delta$ 11350-61; 96,  $\Delta$ 11350-96) together with the wild-type strain Br48 (WT). Fungal genomic DNA was digested with *Hind*III, separated on a 1.2% agarose gel, and hybridized with a DIG-labeled probe. (c) Relationship between the genomic copy number and the rate of DNA methylation of MGY- $\Delta$ RT in the three double deletion mutants. The solid and dashed lines represent the regression lines of the wild-type and  $\Delta$ 11350-22 strains, respectively, shown in Fig. 1a.

**Supplementary Figure 3. Transposition-deficient MGY- $\Delta$ RT is targeted for DNA methylation at levels comparable to the wild-type MAGGY element**

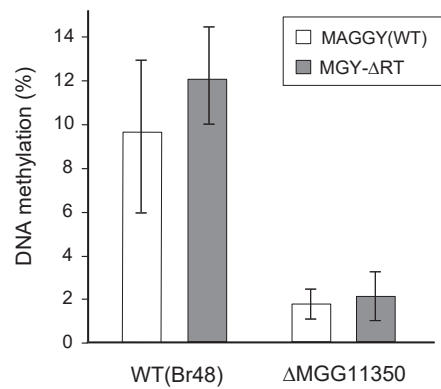

The wild-type MAGGY and its transposition-deficient mutant, MGY- $\Delta$ RT were introduced into the *P. oryzae* Br48 (wild-type) and  $\Delta$ 11350-22 strains, respectively. At least three independent transformants with the wild-type MAGGY or MGY- $\Delta$ RT were picked up, and subjected to DNA methylation assay by the qMSRE method. In case of MGY- $\Delta$ RT, transformants possessing 8 to 10 integrated copies of the element were selected and used in the analysis. Each bar represents the average of eight biological replicates ( $\pm$ SE).

## Supplementary Figure 4. Construction of a single deletion mutant of *Ddnm1* or *Rhm51*

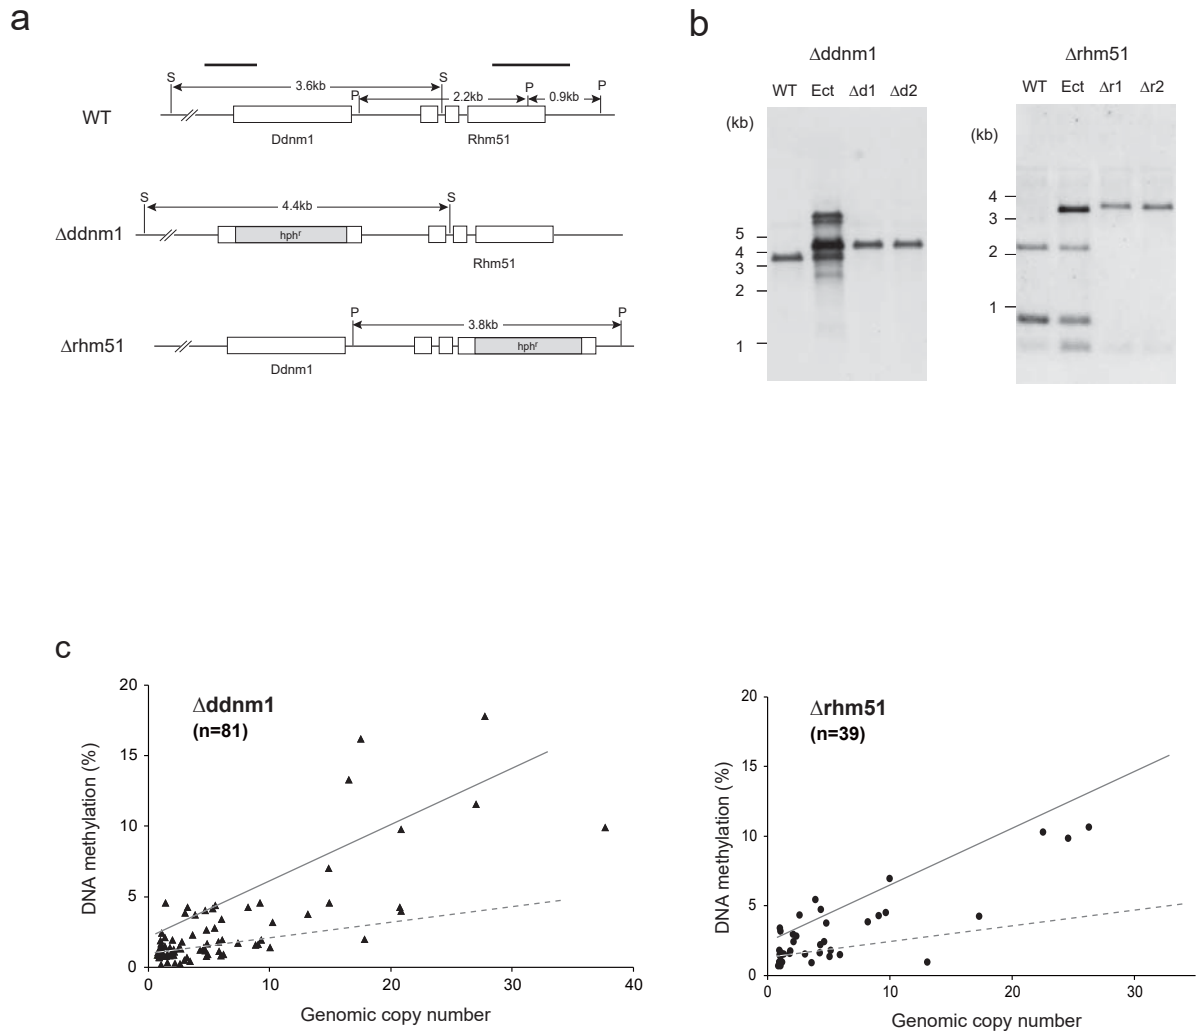

(a) Presumed genome structures of the *Rhm51* and *MGG\_15577* loci in the wild type Br48 (WT),  $\Delta$ *ddnm1*, and  $\Delta$ *rhm51* strains. The deletion strains were obtained via gene targeting by homologous recombination using the hygromycin resistance gene (*Hyg<sup>r</sup>*) as a selection marker. The bold line shows the position of probes used in the Southern blot analysis. The sizes of the *Stu*I and *Pvu*II fragments are given with arrowed lines. P, *Pvu* II. S, *Stu* I. (b) Genomic Southern analysis of  $\Delta$ *ddnm1*, and  $\Delta$ *rhm51*. Fungal genomic DNA was digested with *Pvu* II or *Stu* I, separated on a 1.2% agarose gel, and hybridized with a DIG-labeled probe. The wild-type strain (WT) and an ectopic mutant (Ect) were also used in the analysis. (c) Relationship between the genomic copy number and the rate of DNA methylation of MAG- $\Delta$ RT in the  $\Delta$ *ddnm1*, and  $\Delta$ *rhm51* strains. The solid and dashed lines represent the regression lines of the wild-type and  $\Delta$ 11350-22 strains, respectively (Fig. 1a).



**Supplementary Figure 5. Ddnm1 and Rhm51 are involved in heterochromatin formation to suppress MAGGY transposition.**

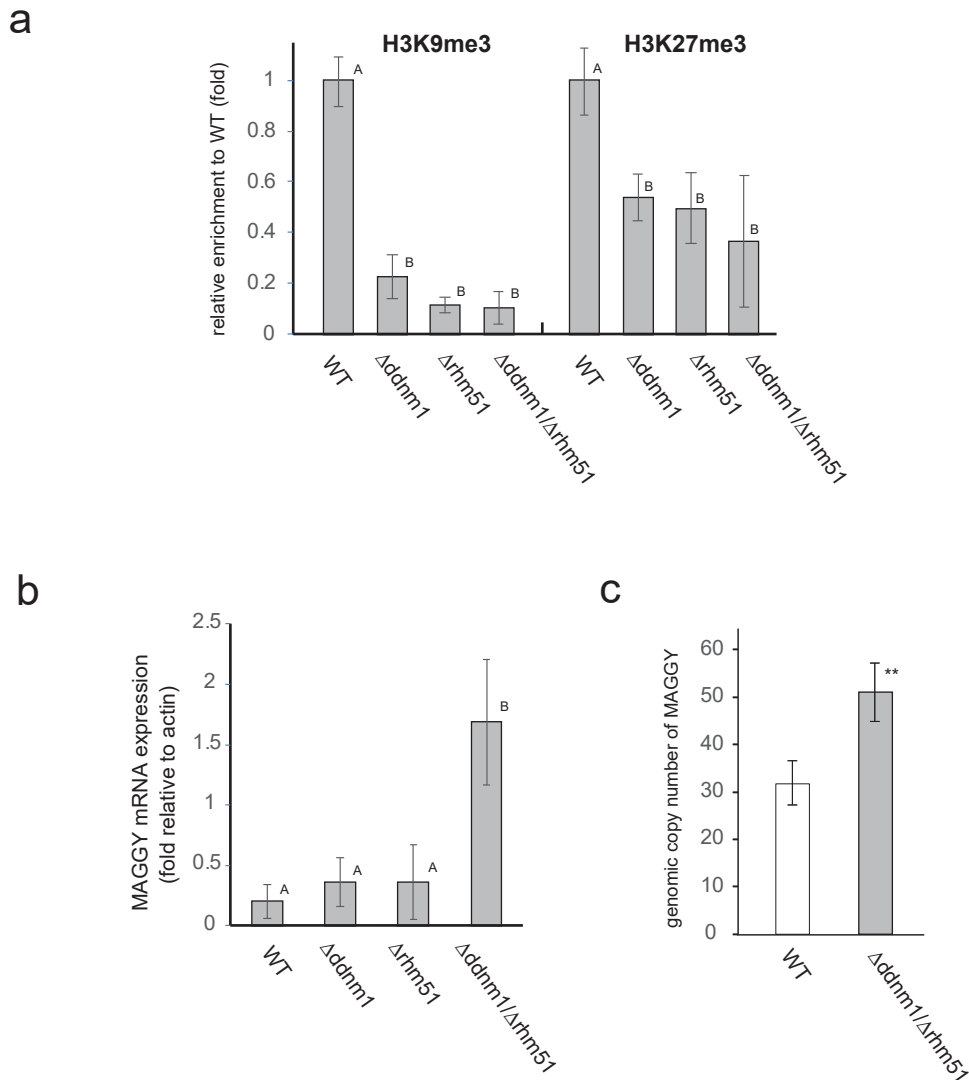

(a) ChIP-qPCR analysis of H3K9me3 and H3K27me3 at MGY- $\Delta$ RT loci in the wild-type (WT) and  $\Delta$ ddnm1,  $\Delta$ rhm51 and  $\Delta$ ddnm1/ $\Delta$ rhm51 cells. In the qPCR assay, a MAGGY fragment in the integrase domain was amplified using a pair of primers (5'-ctgctatccactgctcacca-3', 5'-gaagc-caacttccaatca-3'). The data was normalized to a reference actin gene. Enrichment of the histone modifications relative to WT is presented. Each bar represents the average of three replicates ( $\pm$ SE). Different capital letters indicate significant differences between the means (Tukey/Kramer,  $p < 0.05$ ) (b) qRT-PCR analysis of MAGGY mRNA with the primers used in (a). The data was normalized to actin mRNA. Each bar represents the average of three replicates ( $\pm$ SE). Different capital letters indicate significant differences between the means (Tukey/Kramer,  $p < 0.05$ ) (c) Intron-excision assay for assessing the transposition activity of MAGGY in the WT and  $\Delta$ ddnm1/ $\Delta$ rhm51 strains. A relative ratio of intron-less or intron-containing MAGGY DNA was measured by qPCR using sets of primers specific to "exon" junction or intron internal sequences. Each bar represents the average of five replicates ( $\pm$ SE). Asterisks indicate a significant difference from WT (two-tailed t-test; \*\*,  $P < 0.01$ ).

Supplementary Figure 6. The full western blot images of Figure 2b.

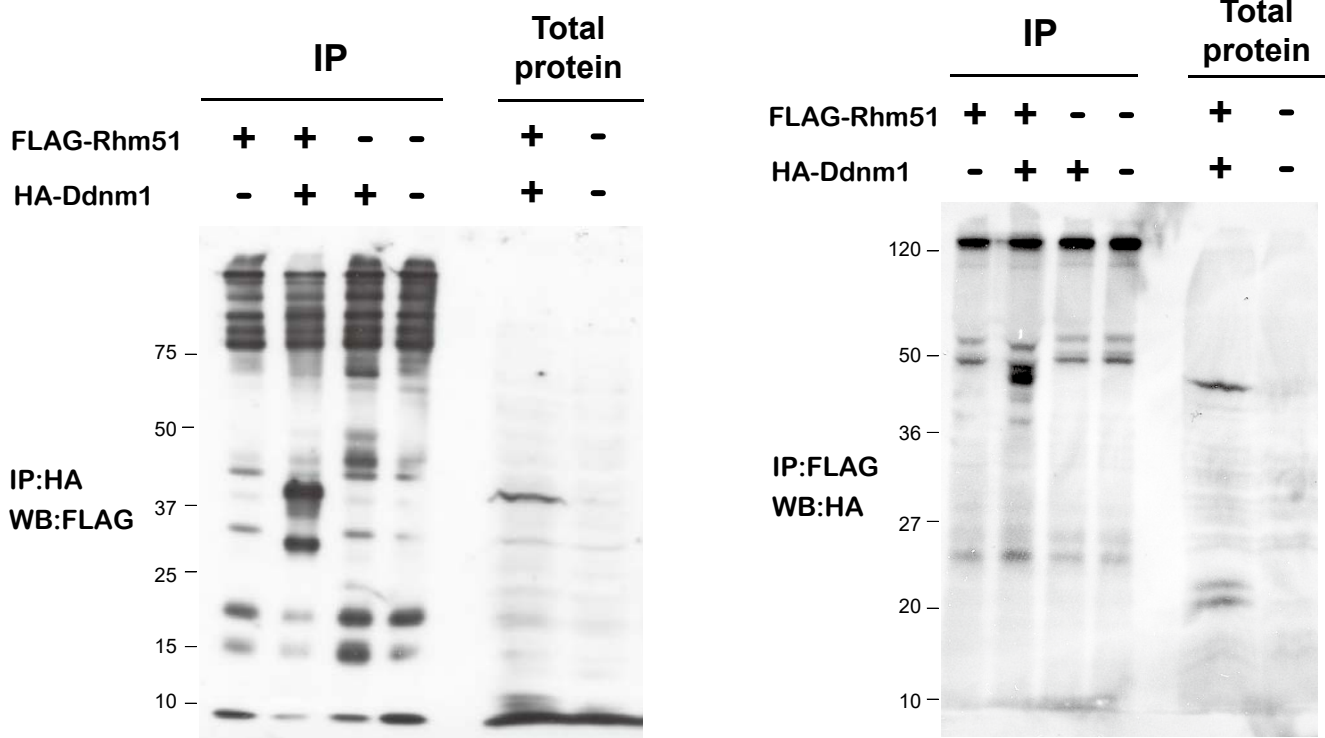

Coimmunoprecipitation assay of Ddnm1 and Rhm51. Ddnm1 and Rhm1 were tagged with HA and FLAG at the N-terminus, respectively, and introduced into *P. oryzae* cells by transformation. Cell lysates were immunoprecipitated (IP) with anti-HA or anti-FLAG antibodies, followed by western blotting (WB) with an anti-FLAG or anti-HA antibody.

**Supplementary Figure 7. The Ddnm1/Rhm51 complex is involved in *de novo* DNA methylation of MAGGY but not its maintenance**

**a**

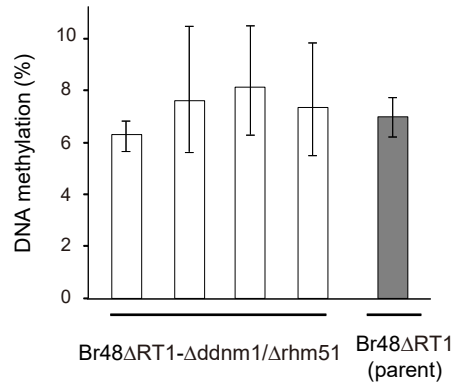

**b**

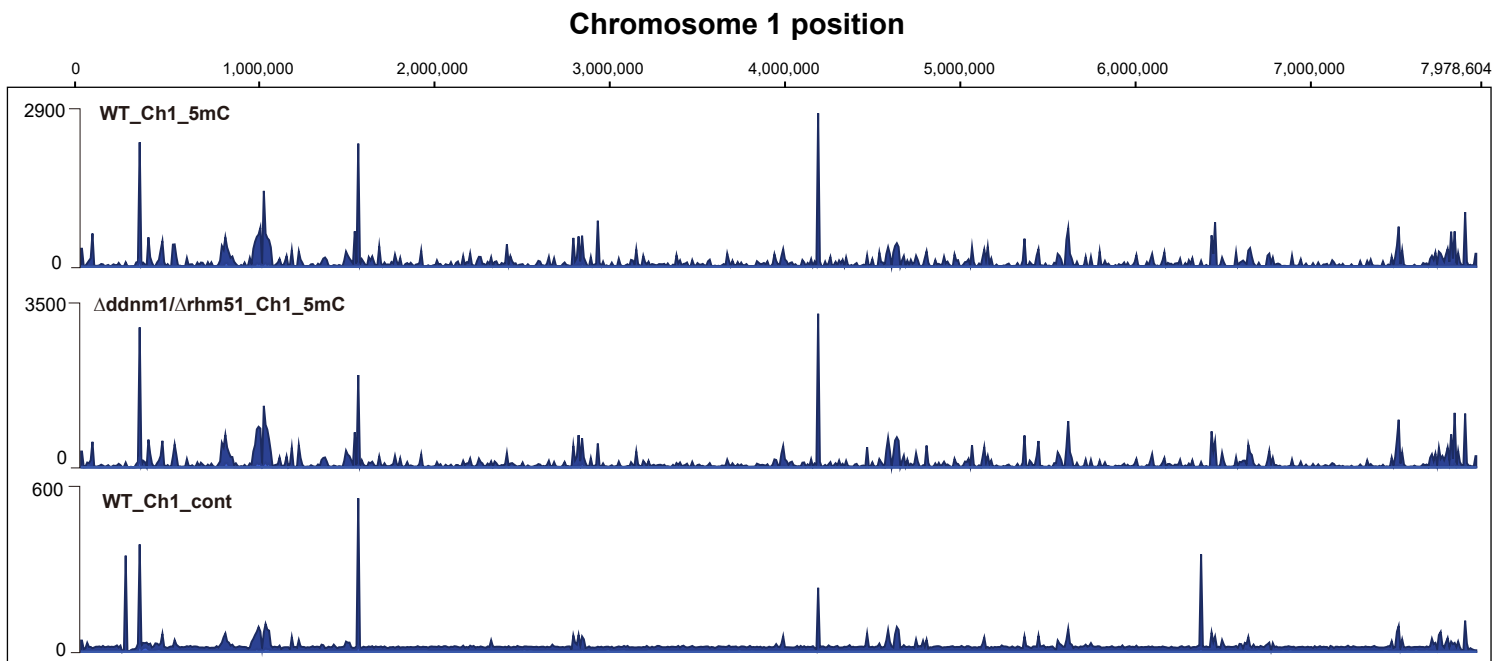

(a) Four independent  $\Delta ddnm1/\Delta rhm51$  double knock-out mutants were constructed using the parent strain Br48 $\Delta$ RT that possesses 10 integrated pMGY- $\Delta$ RT copies in the wild-type background. The degrees of DNA methylation of MAGGY sequences were assessed by the qMSRE method. Each bar represents the average of three technical replicates ( $\pm$ SE). (b) MeDIP-seq reads obtained from the wild-type and  $\Delta ddnm1/\Delta rhm51$  strains were mapped to the genome of the *P. oryzae* reference strain (70-15). As a control, genomic DNA reads of the wild-type strain without MeDIP was used. Three million reads were sampled from each data and used in the analysis. The resulting reads coverages on the entire chromosome 1 are presented.

**Supplementary Figure 8. Construction of deletion mutants of *MoRad55* and *MoRad57***

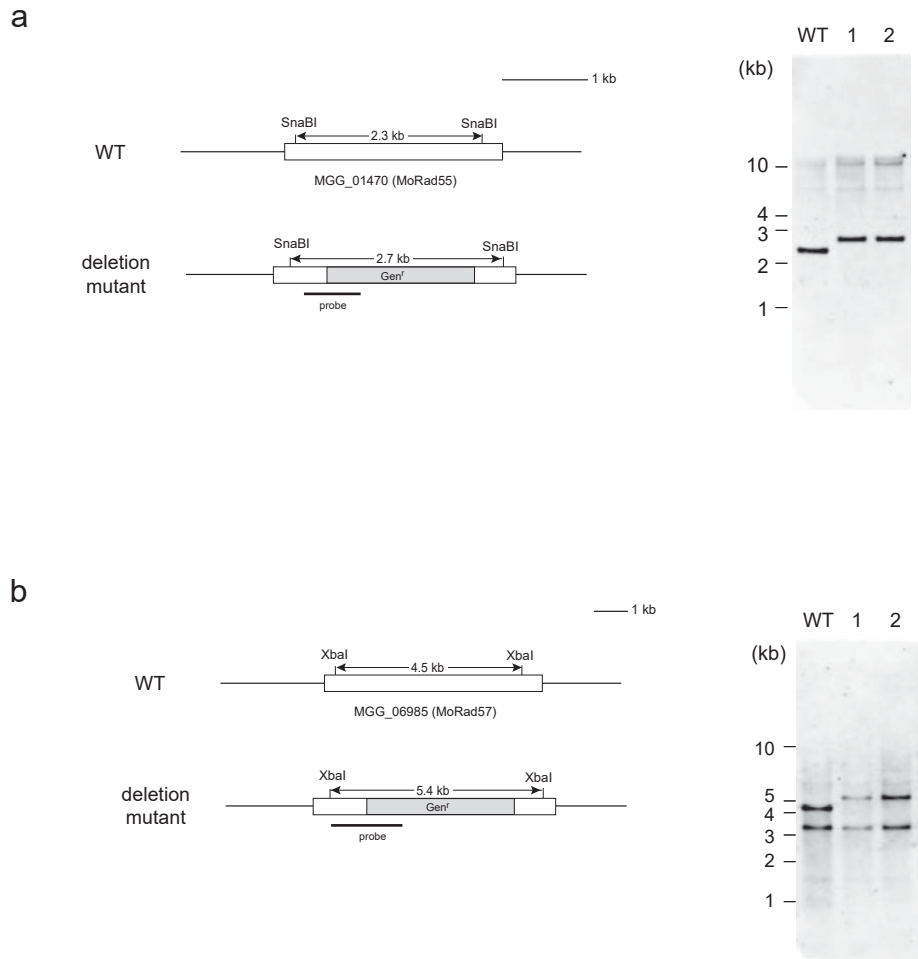

(a) Schematic representation of the *MoRad55* locus (MGG\_01470) in the wild-type and deletion strains, and genomic Southern blots of these strains. The open box indicates ORF. The bold line shows the position of the probe used in the Southern blot analysis. The sizes of the *Sna*BI fragments are given with arrowed lines. WT, wild-type; 1,  $\Delta$ *morad55*; 2,  $\Delta$ *morad55*/ $\Delta$ *ddnm1*. (b) Schematic representation of the *MoRad57* locus (MGG\_06985) in the wild-type and deletion strains, and genomic Southern blots of these strains. The open box indicates ORF. The bold line shows the position of the probe used in the Southern blot analysis. The sizes of the *Xba*I fragments are given with arrowed lines. WT, wild-type; 1,  $\Delta$ *morad57*; 2,  $\Delta$ *morad57*/ $\Delta$ *ddnm1*.

## Supplementary Figure 9. Gene complementation of MoDCL1 and MoAGO2

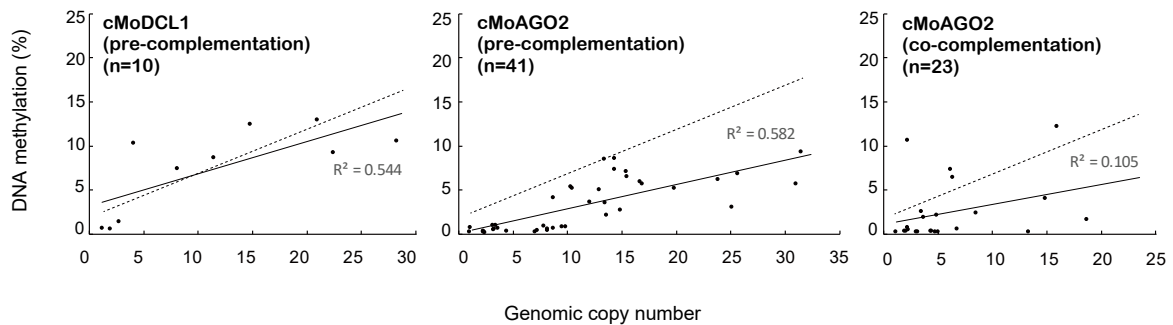

Relation between the degree of DNA methylation and genomic copy number of MGY- $\Delta$ RT in gene complementation strains of *MoDCL1* (cMoDCL1) and *MoAGO2* (cMoAGO2). In pre-complementation experiments, a genomic clone of MoDCL1 or MoAGO2 locus was first introduced into a corresponding deletion strain. Then, pMGY- $\Delta$ RT was further introduced into the resulting gene complemented strain. In co-complementation experiments, a genomic clone of *MoAGO2* and pMGY- $\Delta$ RT were simultaneously introduced into  $\Delta$ moago2 strain. The dashed line represents the regression line of the wild-type strain shown in Fig. 1a.

Supplementary Figure 10. The full western blot images of Figure 5b.

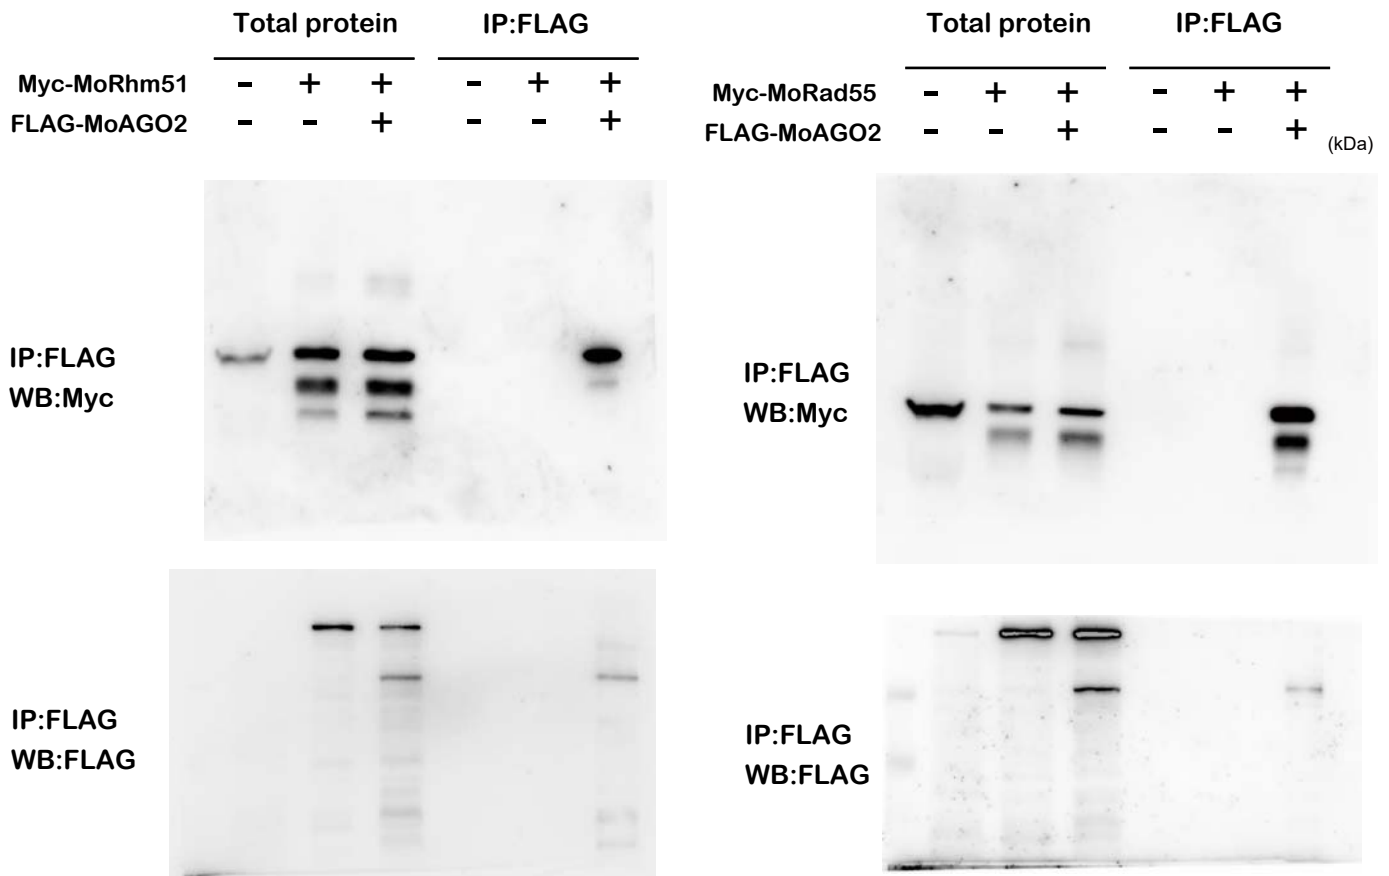

Coimmunoprecipitation assay of MoAGO2 and MoRhm51 or MoRad55. FLAG-tagged MoAGO2 and Myc-tagged MoRhm51 or Myc-tagged MoRad55 were introduced into *P. oryzae* cells by transformation. Cell lysates were immunoprecipitated (IP) with anti-Myc or anti-FLAG antibodies, followed by western blotting (WB) with an anti-FLAG or anti-Myc antibody.

## Reference

37. Urashima *et al.* Molecular analysis of the wheat blast population in Brazil with a homologue of retrotransposon MGR583. *Ann. Phytopathol. Soc. Jpn.* **65**, 429-436 (1999).
