# Supplementary material for: Copy number-dependent DNA methylation of the Pyricularia oryzae MAGGY retrotransposon is triggered by DNA damage
Source: PubMed Central journal article supplement (PMC7979813; doi:10.1038/s42003-021-01836-5), 2021-03-19
Supplement: 42003_2021_1836_MOESM3_ESM.pdf [file 42003_2021_1836_MOESM3_ESM.pdf]

## **Description of Additional Supplementary Files**

**File name:** Supplementary Data 1

**Description:** Primer pairs used in this study

**File name:** Supplementary Data 2

**Description:** All source data for the graphs and charts presented in the main figures
